# Supplementary material for: Translation-dependent mRNA localization to Caenorhabditis elegans adherens junctions
Source: Oxford University Press journal article supplement (doi:10.1242/dev.200027), 2021-11-30
Supplement: dev200027supp.pdf [file dev200027supp.pdf]

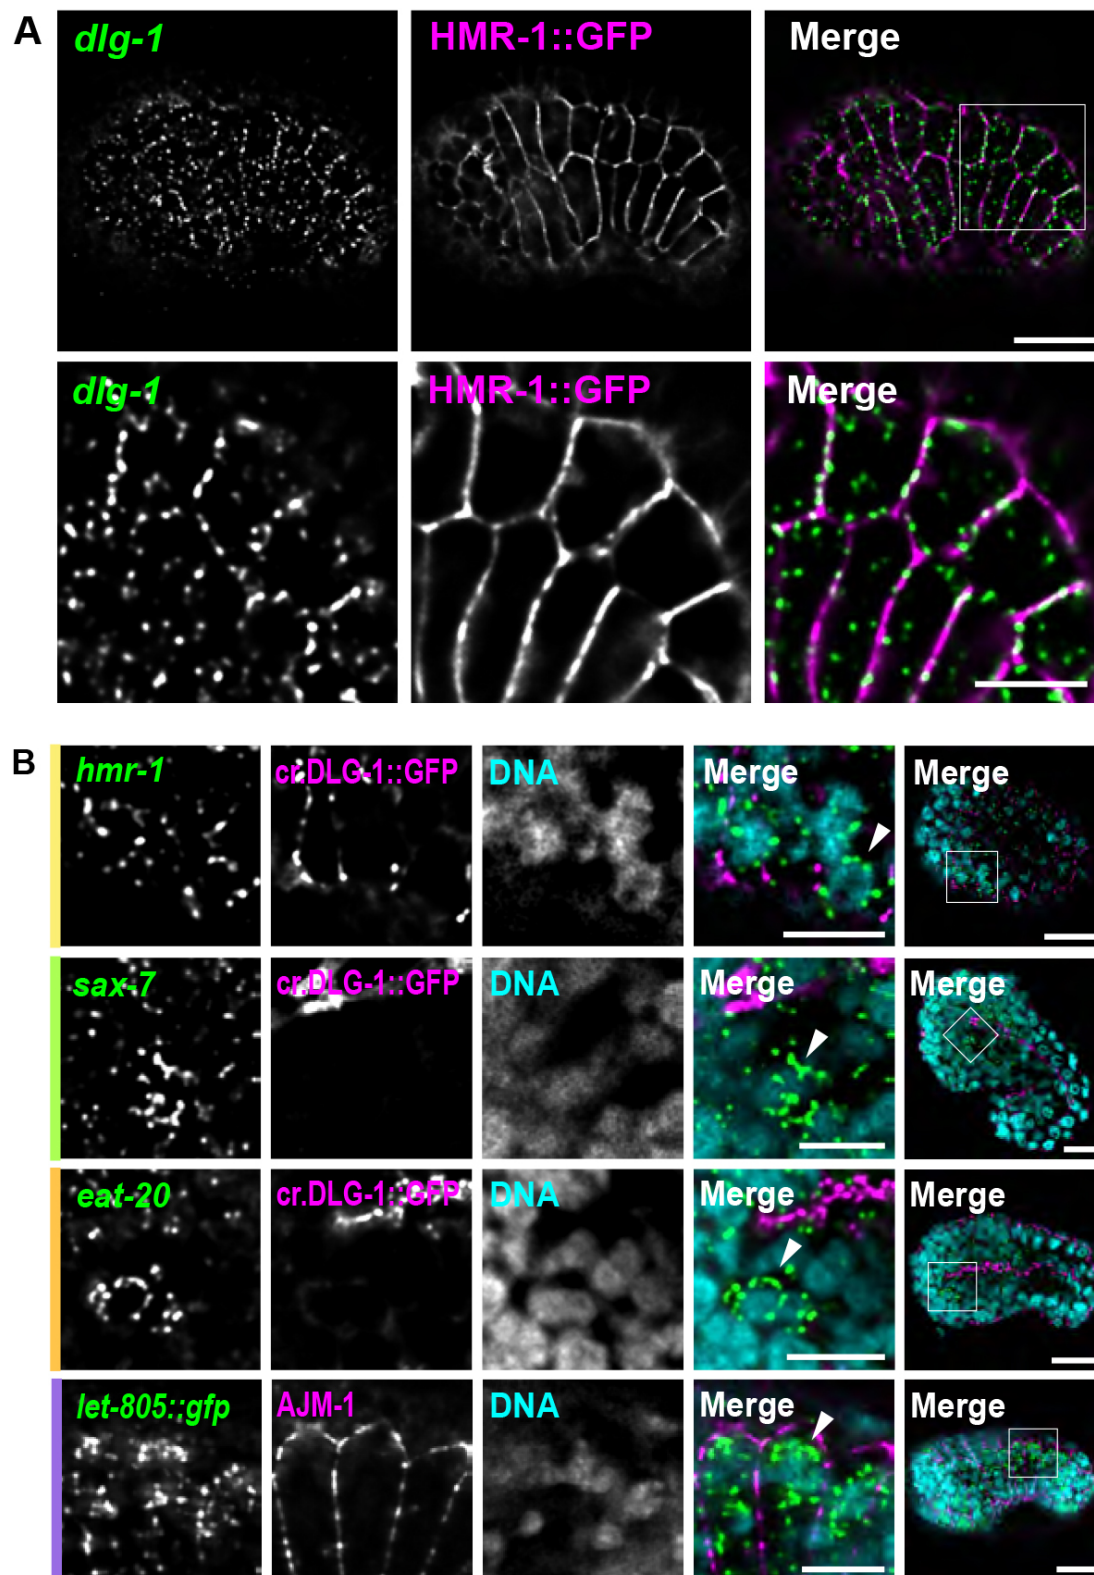

**Fig. S1. Endogenous *dlg-1* is enriched at the CeAJ; transmembrane protein-coding mRNAs show instances of perinuclear localization. A.** Fluorescent micrographs of the entire *C. elegans* embryos (upper panels) and zoom-ins (lower panels) showing smFISH signal of endogenous *dlg-1* mRNAs (green) in epidermal and seam cells of a bean stage, fluorescent signal of the transgenic GFP-tagged HMR-1 protein (HMR-1::GFP, magenta), and merges. Endogenous/non-tagged *dlg-1* mRNA shows CeAJ/membrane localization like its endogenous/GFP CRISPR-tagged version. Scale bar (upper panels): 10  $\mu$ m. Scale bars (lower panels): 5  $\mu$ m. **B.** Fluorescent micrographs of portions and entire *C. elegans* embryos showing instances of perinuclearly localized mRNAs coding for transmembrane proteins (HMR-1, SAX-7, EAT-20, and LET-805::GFP). smFISH signal of localized mRNAs *hmr-1*, *sax-7*, *eat-20*, and *let-805::gfp* (green), fluorescent signal of the CRISPR-engineered DLG-1::GFP (*cr.DLG-1::GFP*) or AJM-1 (magenta), and merges. To the left of each image, bars color-coded as in Fig. 1A to indicate to which sub-class of factors the mRNAs code for. Arrowheads: examples of cells with perinuclearly localized mRNAs. Scale bars: 5  $\mu$ m.

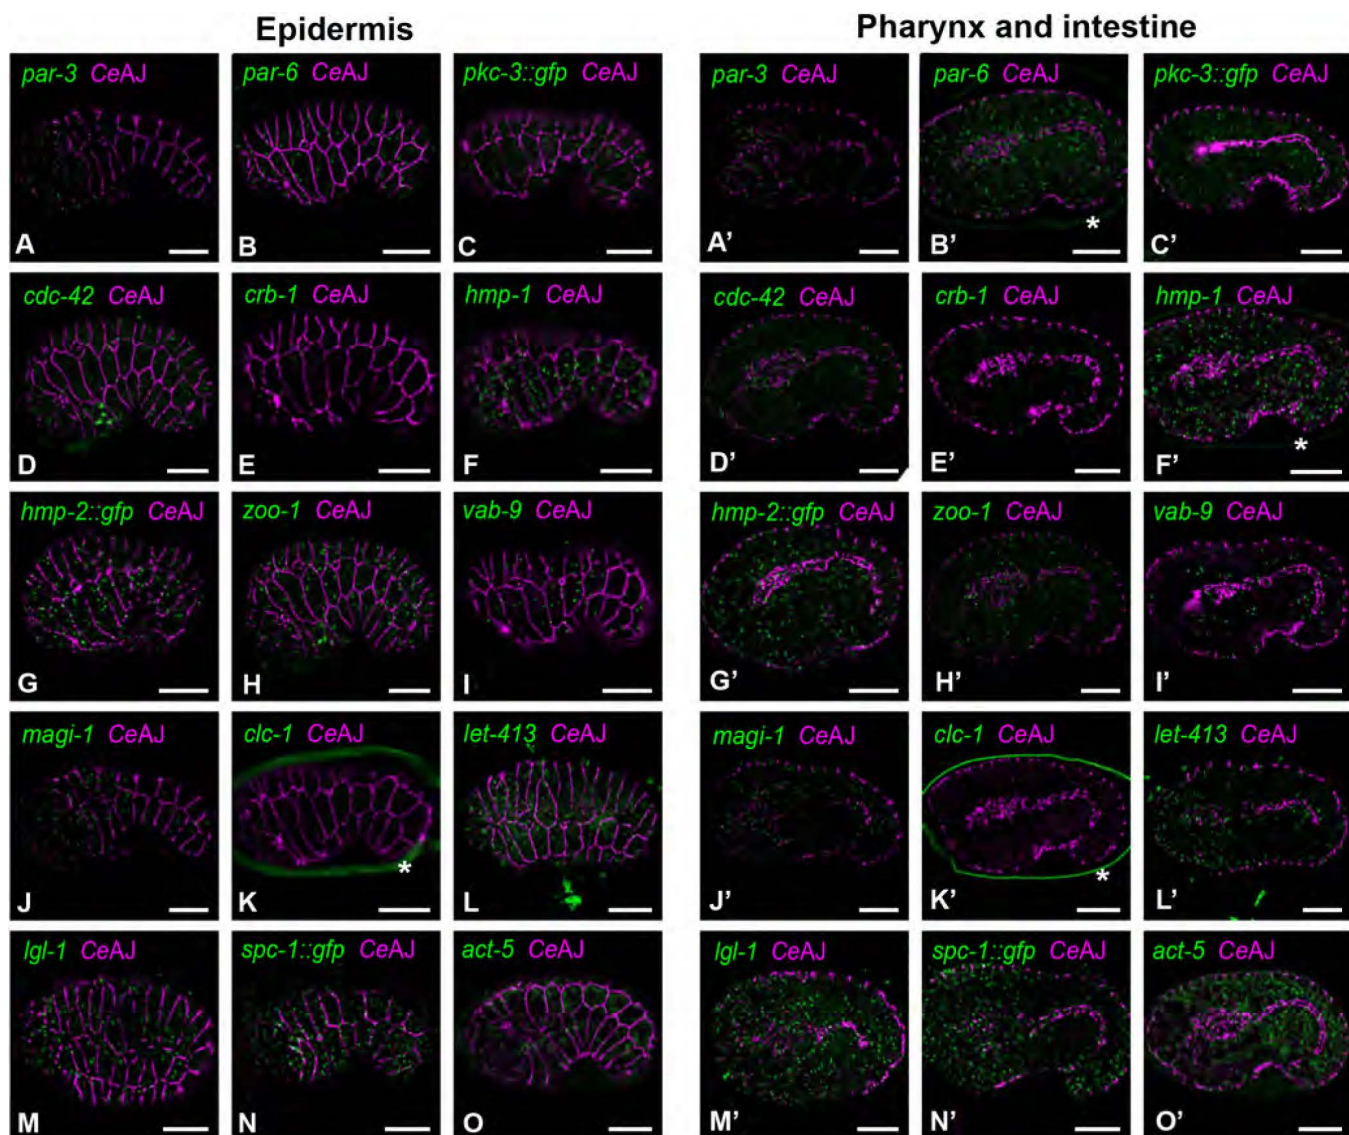

**Fig. S2. Fifteen mRNAs coding for CeAJ, cell polarity, and related components do not show any evident subcellular enrichment. A-O.** Fluorescent micrographs of entire *C. elegans* embryos at the bean/comma stages focusing on the epidermis for the stated mRNAs in each image (green). Magenta: CeAJ marker (cr.DLG-1::GFP or AJM-1 for GFP-tagged lines). White asterisks mark unspecific signal from eggshells. Scale bars: 10  $\mu$ m. **A'-O'.** Same as in A-O but for the forming digestive track (pharynx and intestine).



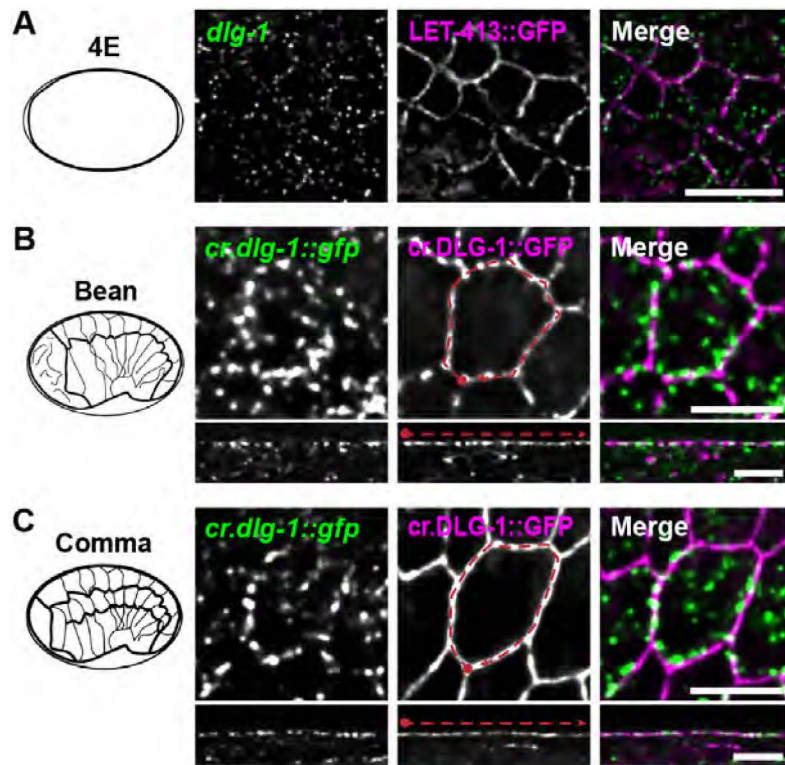

**Fig. S3. *dlg-1* mRNA is enriched at the cell membrane prior to CeAJ maturation.** **A.** Fluorescent micrographs of developing epithelial cells of a portion of a *C. elegans* embryo at the 4E stage (schematics on the left) showing smFISH signal of the endogenous *dlg-1* mRNA (green), fluorescent signal of the transgenic GFP-tagged LET-413 protein (LET-413::GFP, magenta), and merges. Scale bars: 10  $\mu$ m. **B-C.** Top views of fluorescent micrographs of a seam cell at the embryonic bean and comma stages (schematics on the left). Images show smFISH signal of the *dlg-1::gfp* mRNA (*cr.dlg-1::gfp*, green), fluorescent signal of the CRISPR-engineered GFP-tagged DLG-1 protein (*cr.DLG-1::GFP*, magenta), and merges. Red asterisks mark the site from which transverse projections shown below start from. Scale bar: 5  $\mu$ m. Below: corresponding transverse sections on a flat plane of the sole rolled out membrane of the seam cell shown above. Red asterisks mark the horizontal location of CeAJ and the starting site shown above. Scale bar: 5  $\mu$ m.

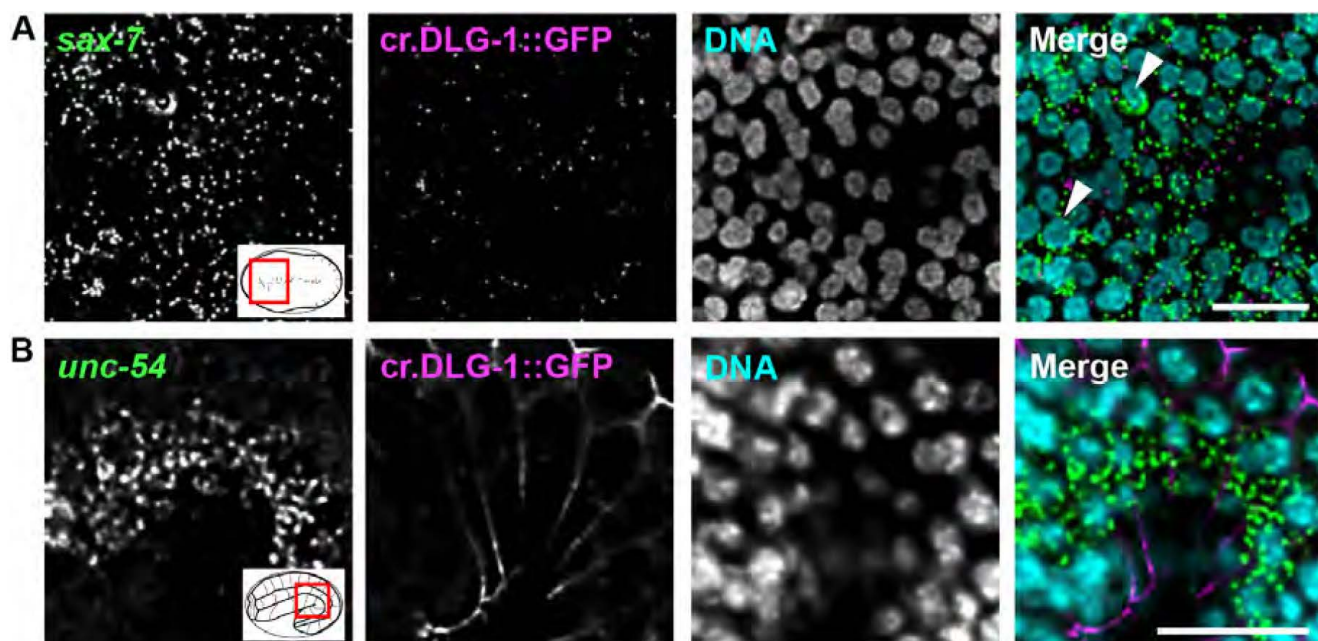

**Fig. S4. The UTRs enrolled in transgenic lines derive from unlocalized mRNAs. A-B.** Maximum intensity projections of 5 (A) and 3 (B) Z-stacks of fluorescent micrographs of portions (red box in the cartoon) of *C. elegans* embryos at the 16E (A) and 1.5-fold (B) stages showing smFISH signal of *sax-7* (A) and *unc-54* (B) mRNAs (green), fluorescent signal of the endogenous GFP-tagged DLG-1 protein (cr.DLG-1::GFP, magenta), DNA (cyan), and merges. Arrowheads: examples of cells with perinuclearly localized *sax-7* mRNA. Such a localization depends on the signal peptide located in the CDS of *sax-7* and not on its UTRs. Scale bars: 10  $\mu$ m.



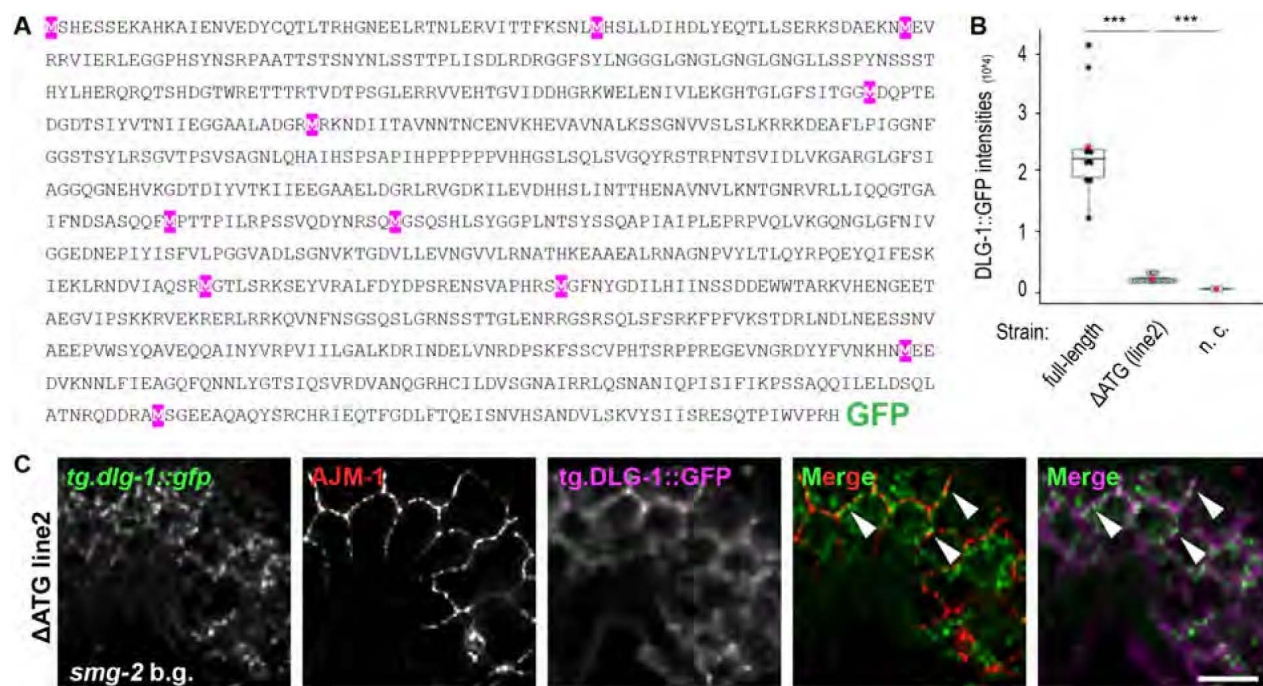

**Fig. S5. *dlg-1* mRNA coding sequence possesses putative alternative start codons that may allow its partial translation.** **A.** Transgenic GFP-tagged (green “GFP” at the carboxy-terminus) DLG-1 protein sequence. Highlighted in magenta are methionine amino acids corresponding to the green asterisks show in Fig. 4A. **B.** Dot plot with box plot: each dot represents the GFP intensity of pharynxes of adult worms carrying a “full-length” (n = 9; mean =  $24.6 \times 10^3$ ; StDev =  $9.4 \times 10^3$ ) or a “ΔATG line2” transgene (n = 15; mean =  $2.0 \times 10^3$ ; StDev =  $0.1 \times 10^3$ ). GFP intensities from animals of the “ΔATG line2” not carrying a transgene (recognizable through the “rolling” phenotype from the co-marker *rol-6*) were used as a negative control (“n. c.”) (n = 3; mean =  $0.4 \times 10^3$ ; StDev =  $0.1 \times 10^3$ ). Red dots represent the mean. Significance of statistical analyses (*t*-test, one tail): \*\*\* = < 0.001. **C.** Fluorescent micrographs of a lateral portion of seam and epithelial cells at the late bean stage of a *C. elegans* embryo showing an example of a “ΔATG” transgene expressed in a null mutant background for an NMD component (“*smg-2 b.g.*”, bottom), that is able to express its coded protein partially (“ΔATG line2”). As in Fig. 4C-E: smFISH signal of altered ATG (“ΔATG”) *tg.dlg-1::gfp* mRNAs (green), immuno-fluorescent signal of the endogenous *AJM-1* protein (red), fluorescent signal of the corresponding ΔATG *tg.DLG-1::GFP* protein (magenta), and merges. Arrowheads: examples of laterally localized mRNAs. Scale bar: 5 μm.

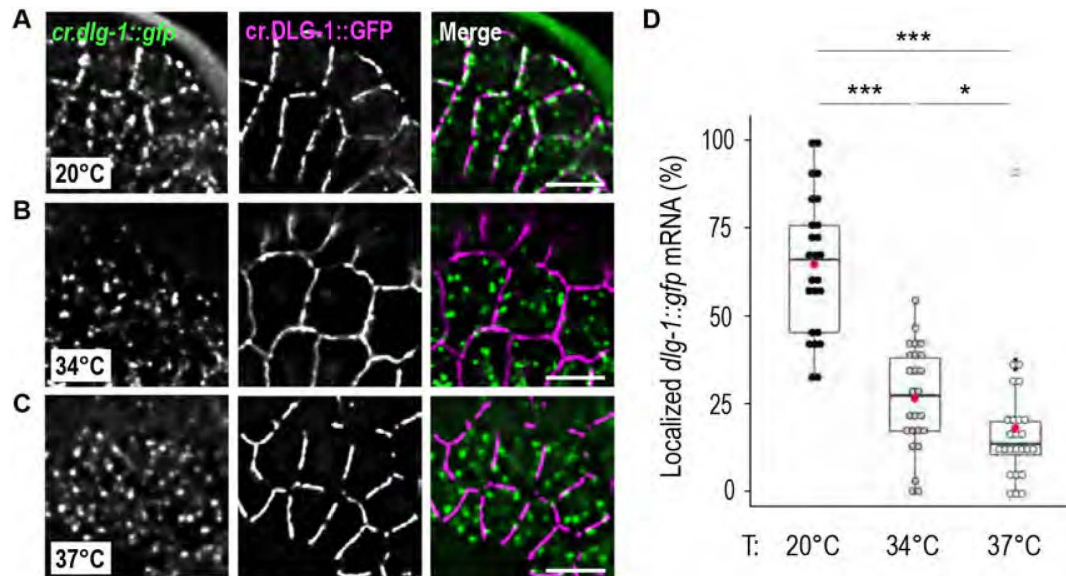

**Fig. S6. *dlg-1* mRNA localization is lost upon heat stress.** **A-C.** Fluorescent micrographs of seam cells of *C. elegans* embryos at the late bean stage that have been grown at 20°C (A) or subsequently subjected to a 1-hour heat-shock at 34°C (B) or 37°C (C) on plates. The images show smFISH signal of *cr.dlg-1::gfp* mRNA (green), fluorescent signal of the corresponding *cr.DLG-1::GFP* (magenta), and merges. Scale bars: 5 µm. **D.** Dot plot with box plot: each dot represents the percentage of laterally localized versus total cellular *cr.dlg-1::gfp* mRNA in each seam cell analyzed for embryos grown at 20°C (black; mean = 65.36; StDev = 19.78) or subsequently subjected to 34°C (grey; mean = 27.35; StDev = 14.85) or 37°C (white; mean = 18.70; StDev = 18.55) heat-shock (n = 25 for all conditions). Data derived from 5 different embryos. Significance of statistical analyses (*t*-test, one tail): \* = < 0.05; \*\*\* = < 0.001.

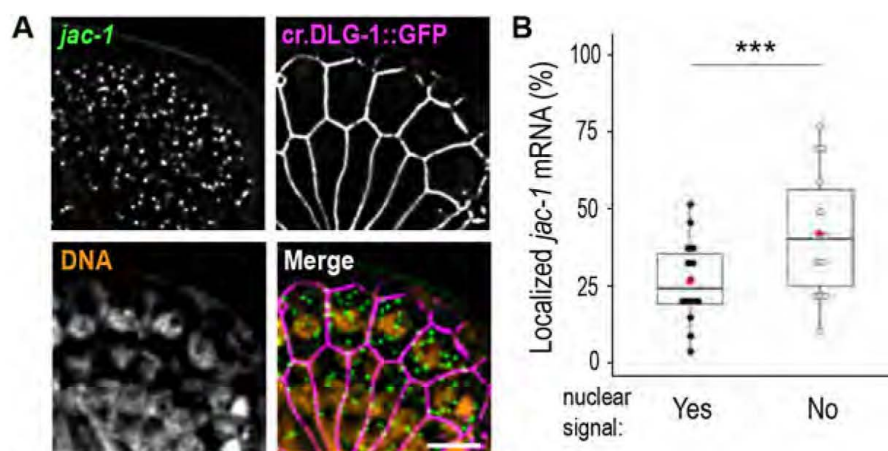

**Fig. S7. The baseline percentage of lateral localization to call an mRNA unlocalized varies if the nuclear signal is taken under consideration or not. A.** Fluorescent micrographs of the five posterior seam cells of a *C. elegans* embryo at the bean stage. The images show smFISH signal of *jac-1* mRNA (green), fluorescent signal of *cr.DLG-1::GFP* (magenta), DNA staining (orange), and merge. Scale bar: 5  $\mu$ m. **B.** Dot plot with box plot: each dot represents the percentage of laterally localized versus “total” (“nuclear signal: yes”; black; mean = 25.87; StDev = 13.36) or versus “total” minus “nuclear” (“nuclear signal: no”; white; mean = 40.98; StDev = 20.05) *jac-1* mRNA in each seam cell at the bean stage analyzed (n = 14) (Table S2; Materials and methods). Data derived from 3 different embryos. Significance of statistical analyses (*t*-test, one tail): \*\*\* = < 0.001.



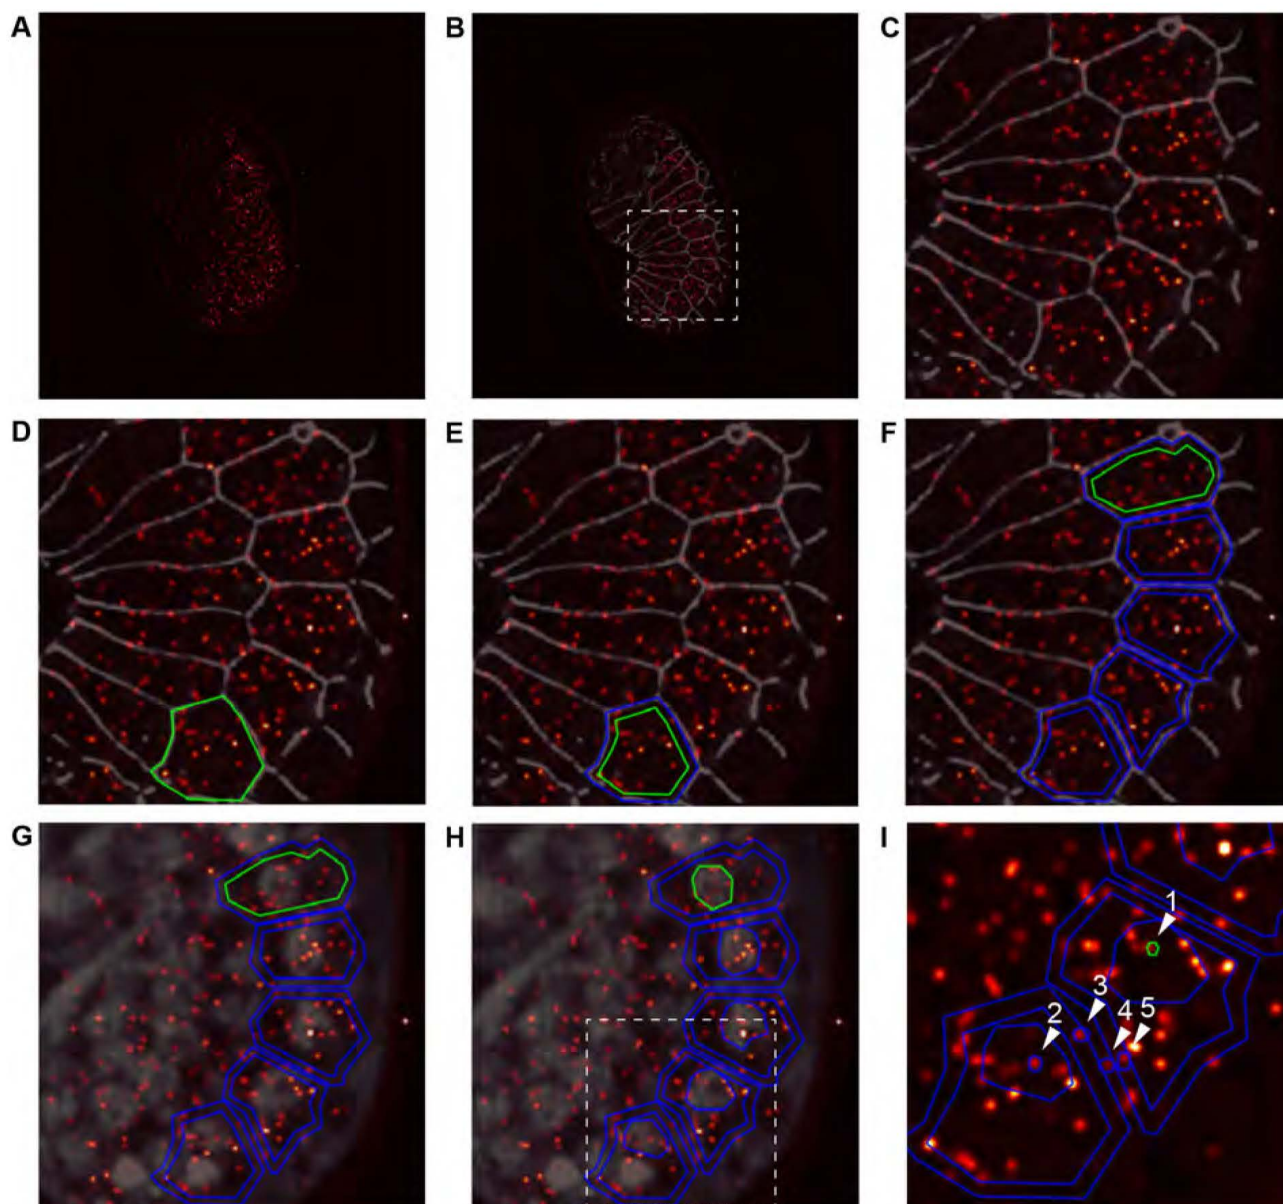

**Fig. S8. Quantitation through FISH-quant provides total, cytoplasmic, and nuclear mRNA counts.** **A.** Fluorescent micrograph (maximum intensity projection) of the same embryo shown in Fig. S7A showing smFISH signal of *jac-1* mRNA (red) from the FISH-quant platform. **B.** Same embryo as in (A) with cr.DLG-1::GFP signal (grey) to identify seam cells. Dashed square: portion of the embryo zoomed-in in (C). **C.** Zoom-in showing the five seam cells that will be undergoing the analysis through FISH-quant. **D.** Example of an outline (green) drawn along the border of a seam cell marked by cr.DLG-1::GFP signal. This outline provides the counts for the “total” cellular mRNA. **E.** Example of an outline (green) drawn parallel ( $\pm 500$  nm) to the outer border (blue) of the same seam cell. This outline provides the counts for the “cytoplasmic + nuclear” mRNA. **F.** Outlines of the five seam cells that will be undergoing the analysis through FISH-quant. **G.** Same as (F), but showing the DNA signal (grey) instead of the cr.DLG-1::GFP signal. **H.** Same as in (G) showing the outlined DNA signals (small polygons in blue and green) to mark the “nuclear” mRNA. Dashed square: portion of the embryo zoomed-in in (I). **I.** Zoom-in on two of the five seam cells that will be undergoing the analysis through FISH-quant and showing the outlined mRNA dots chosen as units (small ellipses in blue and green).

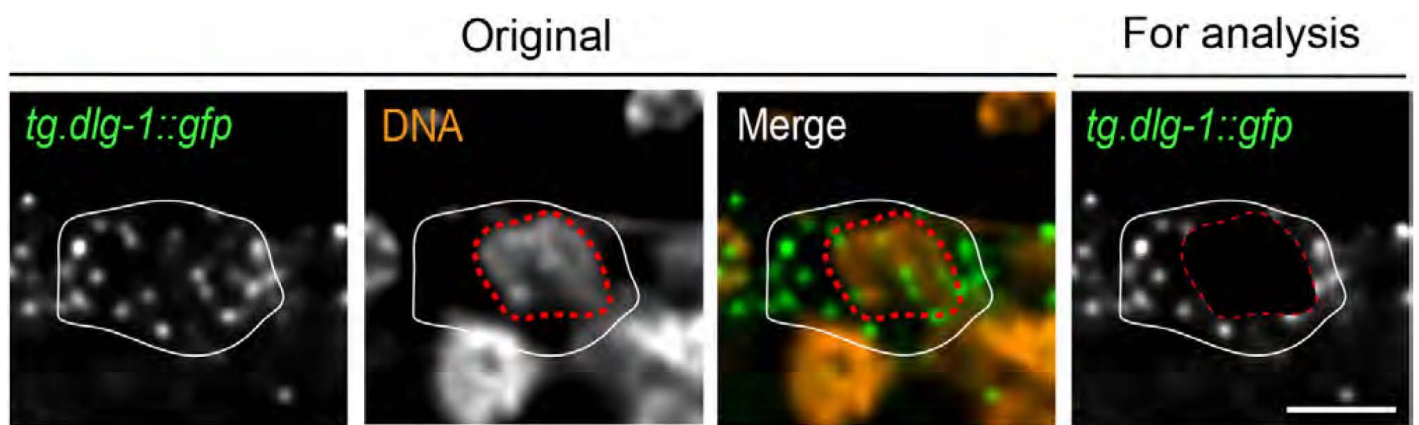

**Fig. S9. Removal of smFISH signal overlapping with DNA in apicobasal and apical profile analyses.** Fluorescent micrographs of a seam cell at the bean stage seen in frontal view ( $\Delta L27$  line). In the first three panels, from left to right: smFISH signal of *tg.dlg-1 $\Delta L27$*  mRNA (green), DNA staining (orange), and merge. White continuous lines: periphery of the cell. Red dashed lines: periphery of the DNA staining. On the very right: smFISH signal of *tg.dlg-1 $\Delta L27$*  mRNA, (same as on the very left) with the mRNA signal overlapping with the DNA staining being removed for profile analyses shown in Fig. 6 (Methods). Scale bar: 2.5  $\mu\text{m}$ .

**Table S1. List of factors enrolled in the smFISH survey.** Names of the factors and their orthologues whose mRNAs were tested in our smFISH-based survey for localized mRNAs highlighted in the same color-code as in Fig. 1A to address to which group of localized protein they belong to (Factor); to what (if any) AS they belong to (Adhesion system); subcellular localization of the stated factor (Protein localization); WormBase identification number (WormBaseID); gene sequence name (Sequence name); mRNA localization observed in this study (Observed mRNA localization); target of smFISH probes (smFISH probes; for full list of probe sequences, see Table S4); strain that has been tested in our survey for the corresponding mRNA/factor (Strain tested); reference for the corresponding factor (Reference).

[Click here to download Table S1](#)

**Table S2. Raw data for image quantitation.** Raw data (mRNA counts), percentages of localization, means, and standard deviations, for all the quantification analyses in this study.

[Click here to download Table S2](#)

**Table S3. List of methionine amino acid within the DLG-1 sequence.** Amino acid positions and domain location of the 11 methionine amino acids found in the DLG-1 sequence, corresponding to the green asterisks in Fig. 4A.

[Click here to download Table S3](#)

**Table S4. List of *C. elegans* strains.** Detailed list of names, genotypes, and references of *C. elegans* strains used in this work.

[Click here to download Table S4](#)

**Table S5. List of smFISH probes.** Sequences of the smFISH primary probes used in this study.

[Click here to download Table S5](#)



## Supplemental references

- Achilleos, A., Wehman, A. M., & Nance, J. (2010). PAR-3 mediates the initial clustering and apical localization of junction and polarity proteins during *C. elegans* intestinal epithelial cell polarization. *Development*, 137(11), 1833-42. <https://doi.org/10.1242/dev.047647>.
- Asano, A., Asano, K., Sasaki, H., Furuse, M., & Tsukita, S. (2003). Claudins in *Caenorhabditis elegans*: their distribution and barrier function in the epithelium. *Curr Biol*, 13(12), 1042-6. [https://doi.org/10.1016/s0960-9822\(03\)00395-6](https://doi.org/10.1016/s0960-9822(03)00395-6)
- Carberry, K., Wiesenfahrt, T., Geisler, F., Stöcker, S., Gerhardus, H., Überbach, D., Davis, W., Jorgensen, E., Leube, R. E., & Bossinger, O. (2012). The novel intestinal filament organizer IFO-1 contributes to epithelial integrity in concert with ERM-1 and DLG-1. *Development*, 139(10), 1851-62. <https://doi.org/10.1242/dev.075788>
- Croce, A., Cassata, G., Disanza, A., Gagliani, M. C., Tacchetti, C., Malabarba, M. G., Carlier, M. F., Scita, G., Baumeister, R., & Di Fiore, P. P. (2004). A novel actin barbed-end-capping activity in EPS-8 regulates apical morphogenesis in intestinal cells of *Caenorhabditis elegans*. *Nat Cell Biol*, 6(12), 1173-9. <https://doi.org/10.1038/ncb1198>
- Jia, R., Li, D., Li, M., Chai, Y., Liu, Y., Xie, Z., Shao, W., Xie, C., Li, L., Huang, X., Chen, L., Li, W., & Ou, G. (2019). Spectrin-based membrane skeleton supports ciliogenesis. *PLoS Biol*, 17(7), e3000369. <https://doi.org/10.1371/journal.pbio.3000369>.
- Marston, D. J., Higgins, C. D., Peters, K. A., Cupp, T. D., Dickinson, D. J., Pani, A. M., Moore, R. P., Cox, A. H., Kiehart, D. P., & Goldstein, B. (2016). MRCK-1 Drives Apical Constriction in *C. elegans* by Linking Developmental Patterning to Force Generation. *Curr Biol*, 26(16), 2079-89. <https://doi.org/10.1016/j.cub.2016.06.010>.
- Morrissey, M. A., Keeley, D. P., Hagedorn, E. J., McClatchey, S. T. H., Chi, Q., Hall, D. H., & Sherwood, D. R. (2014). B-LINK: a hemocentin, plakin, and integrin-dependent adhesion system that links tissues by connecting adjacent basement membranes. *Dev Cell*, 31(3), 319-331. <https://doi.org/10.1016/j.devcel.2014.08.024>
- Norman, K. R., & Moerman, D. G. (2002). Alpha spectrin is essential for morphogenesis and body wall muscle formation in *Caenorhabditis elegans*. *J Cell Biol*, 157(4), 665-77. <https://doi.org/10.1083/jcb.200111051>
- Page, M. F., Carr, B., Anders, K. R., Grimson, A., & Anderson, P. (1999) SMG-2 is a phosphorylated protein required for mRNA surveillance in *Caenorhabditis elegans* and related to Upf1p of yeast. *Mol Cell Biol*, 19(9), 5943-51. <https://doi.org/10.1128/mcb.19.9.5943>.

- Quintin, S., Wang, S., Pontabry, J., Bender, A., Robin, F., Hyenne, V., Landmann, F., Gally, C., Oegema, K., & Labouesse, M. (2016). Non-centrosomal epidermal microtubules act in parallel to LET-502/ROCK to promote *C. elegans* elongation. *Development*, 143(1), 160-73. <https://doi.10.1242/dev.126615>.
- Suman, S. K., Daday, C., Ferraro, T., Vuong-Brender, T., Tak, S., Quintin, S., Robin, F., Gräter, F., & Labouesse, M. (2019). The plakin domain of *C. elegans* VAB-10/plectin acts as a hub in a mechanotransduction pathway to promote morphogenesis. *Development*, 146(24), dev183780. <https://doi.org/10.1242/dev.183780>
- Yang, Y., Zhang, Y., Li, W. J., Jiang, Y., Zhu, Z., Hu, H., Li, W., Wu, J. W., Wang, Z. X., Dong, M. Q., Huang, S., & Ou, G. (2017). Spectraplakin Induces Positive Feedback between Fusogens and the Actin Cytoskeleton to Promote Cell-Cell Fusion. *Dev Cell*, 41(1), 107-120. <https://doi:10.1016/j.devcel.2017.03.006>.
